# Supplementary material for: Plasma Neutrophil Gelatinase-Associated Lipocalin Is Primarily Related to Inflammation during Sepsis: A Translational Approach
Source: PubMed Central journal article supplement (PMC4404058; doi:10.1371/journal.pone.0124429), 2015-04-20
Supplement: pone.0124429.s001.pdf [file pone.0124429.s001.pdf]

## Septic patients

| Septic patients |              |                                  |               |              |              |             |                              |           |
|-----------------|--------------|----------------------------------|---------------|--------------|--------------|-------------|------------------------------|-----------|
| NGAL[ng/ml]     | Crea[μmol/l] | EPI [ml/min/1,73m <sup>2</sup> ] | IL-10 [pg/ml] | IL-6 [pg/ml] | IL-8 [pg/ml] | CRP [μg/ml] | ocytes *10 <sup>3</sup> [gr] | PCT [μ/l] |
| 1681,374        | 169          | 78,44898                         | 50,31         | 3811,57      | 5373,16      | 413         | 16                           | 32        |
| 192,8671        | 48           | 107,5779                         | 8,61          | 193,74       | 78,43        | 295         | 24                           | 0,8       |
| 244,6154        | 75           | 77,38144                         | 22,6          | 42,23        | 155,6        | 57          | 19                           | 1,2       |
| 310,3496        | 122          | 67,45956                         | 13,44         | 51,71        | 89,26        | 163         | 14                           | 0,4       |
| 863,0535        | 180          | 60,39148                         | 39,52         | 370,66       | 161,17       | 150         | 15                           | 4,4       |
| 141,1189        | 107          | 79,7867                          |               |              |              | 88,5        | 17                           | 0,1       |
| 381,6783        | 110          | 73,94015                         | 18,15         | 78,67        | 148,38       | 49,5        | 9,8                          | 1         |
| 1122,595        | 291          | 59,08829                         | 0             | 226,76       | 240,54       | 225         | 23                           | 8,3       |
| 64,1958         | 41           | 126,782                          | 4,78          | 12,58        | 23,47        | 116         | 17                           | 0,1       |
| 1927,176        | 299          | 54,85344                         | 25,9          | 124,21       | 120,34       | 187         | 13                           | 1,5       |
| 198,4615        | 105          | 73,27923                         | 5,32          | 14,61        | 59,43        | 67          | 18                           | 4,6       |
| 1017,252        | 214          | 68,4721                          | 9,6           | 678,25       | 42,71        | 216         | 7,3                          | 4,92      |
| 716,4885        | 131          | 66,71192                         | 6,84          | 87,57        | 117,64       | 141         | 14,7                         | 1,45      |
| 1082,901        | 131          | 68,87164                         | 8,22          | 494,81       | 318,08       | 202         | 14,5                         | 3,1       |
| 129,9301        | 77           | 77,25512                         | 3,01          | 3,22         | 7,66         | 3,8         | 13,5                         |           |

## Healthy controls

| Healthy controls |              |             |                                  |              |               |              |                                  |  |
|------------------|--------------|-------------|----------------------------------|--------------|---------------|--------------|----------------------------------|--|
| before           |              |             |                                  |              |               |              |                                  |  |
| NGAL[ng/ml]      | Crea[μmol/l] | CRP [μg/ml] | EPI [ml/min/1,73m <sup>2</sup> ] | IL-6 [pg/ml] | IL-10 [pg/ml] | IL-8 [pg/ml] | ocytes *10 <sup>3</sup> [gpt/μl] |  |
| 36               | 52           | 1,70496     | 124,8979                         | 0            | 4,42          | 7,58         | 10,2                             |  |
| 28               | 57           | 1,88773     | 123,7627                         | 0            | 0             | 5,84         | 4,7                              |  |
| 47               | 43           | 1,49608     | 152,3959                         | 0            | 5,95          | 6,79         | 4,2                              |  |
| 42               | 61           | 1,46997     | 133,8627                         | 0            | 5,41          | 7,95         | 4,9                              |  |
| 32               | 60           | 1,88773     | 130,1237                         | 5,5          | 0             | 0            | 4,4                              |  |
| 34               | 63           | 1,91384     | 118,0832                         | 0            | 0             | 8,3          | 6,9                              |  |
| 24               | 71           | 1,8094      | 119,7313                         | 5,71         | 0             | 10,88        | 3,1                              |  |
| 36,46564         | 69           | 1,54047     | 123,7258                         | 4,83         | 0             | 0            | 5,4                              |  |

## Healthy controls

| Healthy controls |              |             |                                  |              |               |              |                              |      |
|------------------|--------------|-------------|----------------------------------|--------------|---------------|--------------|------------------------------|------|
| after            |              |             |                                  |              |               |              |                              |      |
| NGAL[ng/ml]      | Crea[μmol/l] | CRP [μg/ml] | EPI [ml/min/1,73m <sup>2</sup> ] | IL-6 [pg/ml] | IL-10 [pg/ml] | IL-8 [pg/ml] | ocytes *10 <sup>3</sup> [gr] | Hct2 |
| 44               | 56           | 1,78329     | 121,8895                         | 6,12         | 5,57          | 7,58         | 16,8                         | 42,7 |
| 46               | 61           | 1,91384     | 121,0317                         | 7,3          | 0             | 6,79         | 10,1                         | 43,3 |
| 75               | 47           | 2,02611     | 146,9253                         | 5,92         | 4,94          | 10,26        | 10,4                         | 50,2 |
| 62               | 64           | 1,78329     | 131,2473                         | 10,79        | 6,03          | 9,62         | 8,6                          | 47,4 |
| 35               | 56           | 1,91384     | 133,8663                         | 5,5          | 4,77          | 6,79         | 8                            | 42,8 |
| 67               | 63           | 1,46997     | 118,0832                         | 6,71         | 6,88          | 8,98         | 15                           | 42,3 |
| 39               | 77           | 1,88773     | 115,805                          | 8,69         | 0             | 0            | 7,1                          | 46,4 |
| 72,93128         | 74           | 2,64491     | 120,219                          | 5,81         | 4,42          | 8,3          | 10,2                         | 49,5 |

## Patients with rheumatic disease

| Patients with rheumatic disease |             |                              |                                  |              |              |              |               |  |
|---------------------------------|-------------|------------------------------|----------------------------------|--------------|--------------|--------------|---------------|--|
| before suppressing inflammation |             |                              |                                  |              |              |              |               |  |
| NGAL[ng/ml]                     | CRP [μg/ml] | ocytes *10 <sup>3</sup> [gr] | EPI [ml/min/1,73m <sup>2</sup> ] | Crea[μmol/l] | IL-8 [pg/ml] | IL-6 [pg/ml] | IL-10 [pg/ml] |  |
| 46,28331                        | 9,5         | 6                            | 104,7675                         | 63           | 23,84        | 0            | 0             |  |
| 98,17672                        | 6,9         | 11,5                         | 95,47071                         | 69           | 16,24        | 38,32        | 31,4          |  |
| 158,2734                        | 44,8        | 7,4                          | 107,399                          | 68           | 21,76        | 47,16        | 0             |  |
| 183,4532                        | 22,9        | 12,4                         | 145,9992                         | 36           | 10,6         | 0            | 0             |  |
| 53,95683                        | 139,1       | 9,3                          | 122,1376                         | 58           | 11,84        | 51,6         | 0             |  |
| 61,71108                        | 17,6        | 9,5                          | 98,43708                         | 53           | 12,28        | 13,44        | 0             |  |
| 134,8921                        | 44          | 6,3                          | 103,865                          | 48           | 10,2         | 0            | 0             |  |
| 134,6423                        | 13,3        | 17,5                         | 101,3613                         | 64           | 9,76         | 0            | 0             |  |
| 41,36691                        | 27,6        | 4,2                          | 111,6049                         | 63           | 11,44        | 0            | 0             |  |
| 88,35905                        | 8,9         | 7,7                          | 132,9711                         | 62           | 8,08         | 0            | 0             |  |
| 98,17672                        | 23,7        | 13,1                         | 81,49863                         | 76           | 8,92         | 0            | 0             |  |
| 172,6619                        | 42          | 11,4                         | 116,0513                         | 35           | 29,68        | 14,84        | 0             |  |
| 174,4604                        | 70,9        | 14,5                         | 93,3568                          | 74           | 25,16        | 57,84        | 0             |  |
| 77,13885                        | 22,4        | 6,2                          | 119,154                          | 60           | 14,88        | 28,64        | 0             |  |
| 289,5684                        | 32          | 9                            | 87,75904                         | 62           | 16,68        | 0            | 0             |  |
| 81,34642                        | 13          | 8,3                          | 109,2951                         | 80           | 6,8          | 0            | 0             |  |
| 116,4095                        | 15,6        | 10,1                         | 74,70918                         | 99           | 24,64        | 5,88         | 0             |  |
| 60,30856                        | 14,6        | 8,9                          | 106,2539                         | 71           | 7,24         | 0            | 0             |  |
| 100,9818                        | 6,2         | 10                           | 123,1582                         | 80           | 9,76         | 0            | 0             |  |
| 289,5684                        | 116,1       | 12,1                         | 78,45029                         | 97           | 35,8         | 14,36        | 0             |  |
| 428,0576                        | 135,2       | 7,6                          | 120,5909                         | 76           | 53,16        | 22,16        | 0             |  |
| 64,7482                         | 21,8        | 6,7                          | 107,2943                         | 55           | 10,2         | 11,2         | 0             |  |
| 47,68583                        | 17,4        | 5,4                          | 108,1961                         | 74           | 13,56        | 6,44         | 0             |  |

## Patients with rheumatic disease

| Patients with rheumatic disease |             |                              |                                  |              |              |              |               |  |
|---------------------------------|-------------|------------------------------|----------------------------------|--------------|--------------|--------------|---------------|--|
| after suppressing inflammation  |             |                              |                                  |              |              |              |               |  |
| NGAL[ng/ml]                     | CRP [μg/ml] | ocytes *10 <sup>3</sup> [gr] | EPI [ml/min/1,73m <sup>2</sup> ] | Crea[μmol/l] | IL-8 [pg/ml] | IL-6 [pg/ml] | IL-10 [pg/ml] |  |
| 79,9439                         | 1,9         | 7,5                          | 103,4304                         | 65           | 15,56        | 4,68         | 0             |  |
| 106,5919                        | 22          | 6,4                          | 97,86295                         | 64           | 10,36        | 10,08        | 0             |  |
| 89,92805                        | 66,3        | 8,5                          | 106,7565                         | 69           | 16,48        | 23,4         | 0             |  |
| 77,33813                        | 3,1         | 6,5                          | 122,7441                         | 61           | 0            | 0            | 0             |  |
| 143,8849                        | 2,4         | 5,7                          | 118,0563                         | 63           | 7,8          | 6,84         | 0             |  |
| 60,30856                        | 13,1        | 8,6                          | 97,24475                         | 55           | 12,8         | 4,88         | 0             |  |
| 71,94244                        | 23,4        | 6,5                          | 99,91719                         | 54           | 8,48         | 7            | 0             |  |
| 99,57924                        | 1,9         | 12,6                         | 100,8456                         | 65           | 9,12         | 4,88         | 0             |  |
| 44,96403                        | 1,9         | 3,4                          | 107,5091                         | 69           | 11,28        | 5,04         | 0             |  |
| 63,11361                        | 1,9         | 5,5                          | 128,7993                         | 67           | 0            | 0            | 0             |  |
| 86,95652                        | 5,5         | 10,1                         | 83,34393                         | 71           | 0            | 0            | 0             |  |
| 142,0863                        | 23,9        | 12,4                         | 93,72812                         | 67           | 22,32        | 14,88        | 0             |  |
| 102,518                         | 37,4        | 10,4                         | 91,84436                         | 77           | 21,64        | 19,12        | 0             |  |
| 35,06311                        | 4,7         | 5,3                          | 121,1818                         | 57           | 0            | 0            | 0             |  |
| 77,33813                        | 3,8         | 11,9                         | 85,13209                         | 68           | 0            | 0            | 0             |  |
| 77,13885                        | 1,9         | 5,6                          | 106,0942                         | 86           |              |              |               |  |
| 175,3156                        | 8,1         | 11                           | 73,5079                          | 104          |              |              |               |  |
| 77,13885                        | 1,9         | 5,2                          | 104,4619                         | 74           |              |              |               |  |
| 178,1206                        | 6,4         | 8,5                          | 121,9146                         | 82           |              |              |               |  |
| 167,2662                        | 9,6         | 11,1                         | 71,42635                         | 129          |              |              |               |  |
| 109,7122                        | 44,2        | 4,2                          | 121,9199                         | 74           |              |              |               |  |
| 52,15827                        | 5,2         | 8,1                          | 105,4358                         | 58           |              |              |               |  |
| 46,28331                        | 3,5         | 5,7                          | 110,0522                         | 71           |              |              |               |  |
