# Supplementary material for: Plasma Neutrophil Gelatinase-Associated Lipocalin Is Primarily Related to Inflammation during Sepsis: A Translational Approach
Source: PubMed Central journal article supplement (PMC4404058; doi:10.1371/journal.pone.0124429), 2015-04-20
Supplement: pone.0124429.s002.pdf [file pone.0124429.s002.pdf]

| Readout     |          | NGAL [ng/ml] |          |          |            |             |          |              |              |
|-------------|----------|--------------|----------|----------|------------|-------------|----------|--------------|--------------|
| Stimulation | Control  | LPS          | IL-6     | NGAL     | LPS + NGAL | IL-6 + NGAL | NGAL(-S) | LPS+NGAL(-S) | IL6+NGAL(-S) |
|             | 162,809  | 285,2809     | 248,2023 | 1523,483 | 1867,303   | 1553,82     | 523,4832 | 867,3033     | 553,8202     |
|             | 170,6742 | 398,764      | 204,382  | 2204,382 | 1621,236   | 1771,798    | 1204,382 | 621,236      | 771,7977     |
|             | 151,573  | 368,427      | 196,5168 | 1987,528 | 2120,112   | 2085,281    | 987,5281 | 1120,112     | 1085,281     |
|             | 160,5618 | 578,5393     | 297,6404 | 1947,079 | 1912,247   | 2172,921    | 947,0787 | 912,2472     | 1172,921     |

  

| Readout     |         | IL-6 [pg/ml] |        |         | IL-8 [pg/ml] |         |  |
|-------------|---------|--------------|--------|---------|--------------|---------|--|
| Stimulation | Control | IL-6         | NGAL   | Control | IL-6         | NGAL    |  |
|             | 178,2   | 430,52       | 677,48 | 3214,52 | 3722,96      | 2313,32 |  |
|             | 103,92  | 244,72       | 101    | 1775,68 | 2271,48      | 1712,04 |  |
|             | 124,76  | 378,32       | 113,04 | 2313,32 | 2488,52      | 1775,68 |  |
|             | 115,56  | 224,12       | 141,88 | 2355,92 | 1426,12      | 1759,56 |  |

  

| Readout     |         | IL-6 [pg/ml] |          |         | IL-8 [pg/ml] |          |         | IL-10 [pg/ml] |          |         | LDH [U/I] |          |  |
|-------------|---------|--------------|----------|---------|--------------|----------|---------|---------------|----------|---------|-----------|----------|--|
| Stimulation | Control | LPS          | LPS+NGAL | Control | LPS          | LPS+NGAL | Control | LPS           | LPS+NGAL | Control | LPS       | LPS+NGAL |  |
|             | 178,2   | 54104,04     | 57617,96 | 3214,52 | 13828,4      | 20148,28 | 0       |               | 62,2     | 171     | 271       | 213      |  |
|             | 103,92  | 55249,08     | 50819,12 | 1775,68 | 16507,2      | 11060,48 | 0       | 82,16         | 61,4     | 242     | 269       | 159      |  |
|             | 124,76  | 59466,16     | 57617,96 | 2313,32 | 10642,36     | 8915,04  | 0       | 80,28         | 72,16    | 235     | 301       | 218      |  |
|             | 115,56  | 58227,08     | 58227,08 | 2355,92 | 9485,44      | 9129,96  | 0       | 87,96         | 76,6     | 151     | 271       | 196      |  |
