# Supplementary material for: Plasma Neutrophil Gelatinase-Associated Lipocalin Is Primarily Related to Inflammation during Sepsis: A Translational Approach
Source: PubMed Central journal article supplement (PMC4404058; doi:10.1371/journal.pone.0124429), 2015-04-20
Supplement: pone.0124429.s003.pdf [file pone.0124429.s003.pdf]

| hours after Sepsis induction | Treatment (dead = 1, survival after 24h =0) |      |
|------------------------------|---------------------------------------------|------|
| hours                        | control                                     | NGAL |
| 12                           | 1                                           |      |
| 12                           | 1                                           |      |
| 12                           | 1                                           |      |
| 12                           | 1                                           |      |
| 12                           | 1                                           |      |
| 12                           | 1                                           |      |
| 15                           | 1                                           |      |
| 18                           | 1                                           |      |
| 15                           |                                             | 1    |
| 15                           |                                             | 1    |
| 15                           |                                             | 1    |
| 18                           |                                             | 1    |
| 18                           |                                             | 1    |
| 21                           |                                             | 1    |
| 24                           |                                             | 0    |
| 24                           |                                             | 0    |
| 24                           |                                             | 0    |
